# Supplementary material for: Ferromagnetic interactions through triple hydrogen bonds in the coordination polymers of α,α′-dihydroxy-bibenzyl-4,4′-dicarboxylate
Source: Royal Society of Chemistry journal article supplement (doi:10.1039/b925212f), 2010-01-01
Supplement: b925212f.pdf [file b925212f.pdf]

## Electronic Supplementary Information

### Ferromagnetic interactions through triple hydrogen bonds in the coordination polymers of $\alpha,\alpha'$ - dihydroxy-bibenzyl-4,4'-dicarboxylate

Yu Ma, Ai-Ling Cheng, and En-Qing Gao\*

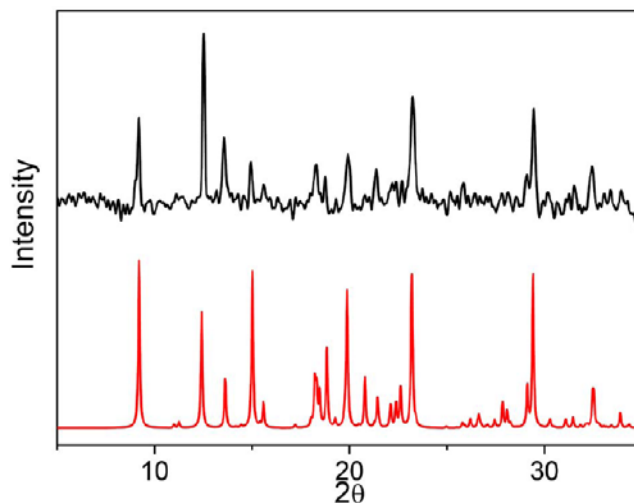

**Fig. S1** Comparison of the PXRD patterns measured for **3** (black) and that calculated from the single-crystal data of **1** (red)

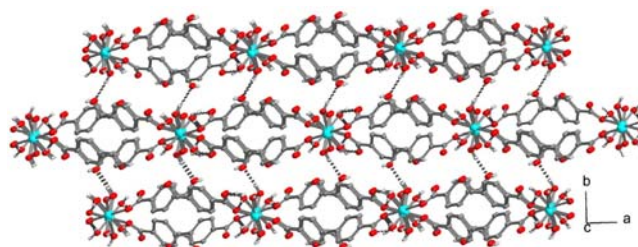

**Fig. S2** the 3D packing of the layers through hydrogen bonds in compound **1**

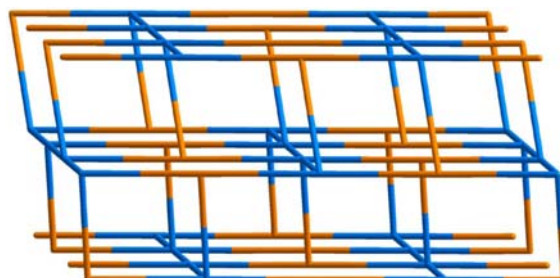

**Fig. S3.** The 3,5-connected  $(4.6^2)(4.6^6.8^3)$  net in compound **1**

**Table S2.** Selected hydrogen-bond lengths [ $\text{\AA}$ ] and angles [ $^\circ$ ] for **2**

| D   | A [Transformation]        | d(D-H)    | d(H $\cdots$ A) | d(D $\cdots$ A) | <(DHA)    |
|-----|---------------------------|-----------|-----------------|-----------------|-----------|
| OW1 | O2                        | 0.77(2)   | 1.99(2)         | 2.7376(16)      | 165(2)    |
| OW1 | O4 [-x+1, -y+1, -z+2]     | 0.74(3)   | 2.35(3)         | 3.0548(16)      | 160(3)    |
| OW2 | O6 [x-1, -y+1/2, z-3/2]   | 0.86(2)   | 1.91(2)         | 2.7552(16)      | 168(2)    |
| OW2 | O3 [x-1, -y+1/2, z-1/2]   | 0.76(3)   | 2.24(3)         | 2.9752(15)      | 163(2)    |
| O3  | OW2 [-x+1, y+1/2, -z+5/2] | 0.81(2)   | 2.11(2)         | 2.8831(14)      | 159.5(19) |
| O4  | OW1 [x, y, z+1]           | 0.747(19) | 2.033(19)       | 2.7621(15)      | 165(2)    |
| O7  | O2                        | 0.87(2)   | 1.88(2)         | 2.6851(14)      | 153.0(18) |
| O7  | O9 [x, -y+1/2, z-1/2]     | 0.78(2)   | 1.94(2)         | 2.7118(14)      | 174(2)    |
| O8  | O1 [x, -y+1/2, z-1/2]     | 0.81(3)   | 2.20(3)         | 3.0031(16)      | 178(2)    |
| O8  | OW1 [-x+1, y-1/2, -z+3/2] | 0.82(2)   | 2.04(2)         | 2.8522(17)      | 166.6(19) |
| O9  | O4 [-x+1, y-1/2, -z+5/2]  | 0.82(2)   | 1.96(2)         | 2.7750(14)      | 175.5(18) |
| O9  | O6 [x-1, -y+1/2, z-3/2]   | 0.85(2)   | 1.81(2)         | 2.6376(13)      | 164.6(18) |
| O9  | O5 [x-1, -y+1/2, z-3/2]   | 0.85(2)   | 2.635(19)       | 3.0127(13)      | 108.3(14) |
| O10 | O5 [x-1, y, z-1]          | 0.79(2)   | 2.07(2)         | 2.8490(15)      | 172.5(19) |
| O10 | OW2 [-x, y+1/2, -z+3/2]   | 0.80(2)   | 2.05(2)         | 2.8477(17)      | 173(2)    |

D = donor, A = acceptor.
